# Supplementary material for: Estimating Selection Coefficients in Spatially Structured Populations from Time Series Data of Allele Frequencies
Source: Oxford University Press journal article supplement (doi:10.1534/genetics.112.147611), 2013-01-11
Supplement: genetics.112.147611-1.xls [file genetics.112.147611-1.xls]

## Sheet: Info
Authors	Title	Journal	Year	Data	Comment
Cook & Turner	Decline of melanism in two British moths: spatial, temporal and inter-specific variation	Heredity	2008	Yes
Cook, Sutton & Crawford	Melanic Moth Frequencies in Yorkshire, an Old English Industrial Hot Spot	J. Heredity	2005	Yes
Grant, Owen, Clarke	Parallel Rise and Fall of Melanic Peppered Moths in America and Britain	J. Heredity	1996	No
Grant, Cook, Clarke, Owen	Geographic and temporal variation in the incidence of melanism in peppered moth populations in America and Britain	J. Heredity	1998	Yes	Includes data from Kettlewell 1973
Cook, Riley & Woiwod	Melanic frequencies in three species of moths in post industrial Britain	Biol. J. Linn Soc	2002	No
Lees & Creed	Industrial Melanism in Biston betularia: The Rôle of Selective Predation	Journal of Animal Ecology	1975	Yes
Kettlewell	A Survey of the Frequencies of Biston Betularia and its Melanic Forms in Great Britain	Heredity	1958	Yes	Data collected 52-56. 54 assumed
Clarke, Grant, Clarke & Asami	A long term assessment of Biston betularia (L.) in one UK locality (Caldy Common near West Kirby, Wirral), 1959-1993, and glimpses elsewhere	The Linnean	1994	Yes	Incorporates all the Clarkes' data
Mani & Majerus	Peppered moth revisited: analysis of recent decreases in melanic frequency and predictions for the future	Biol. J. Linn Soc	1993	No
Cook, Denis & Mani	Melanic morph frequency in the peppered moth in the Manchester area	Proc. R. Soc. B	1999	Yes
West	Biston betularia L. (Lep. Geometridae): continued decline in industrial melanism in north‐west Kent	Entomologist's Record	2003	Yes
Bishop, Cook & Muggleton	The response of two species of moths to industrialization in northwest England. I. Polymorphisms for melanism	Phil. Trans. R. Soc B	1978	No

## Sheet: Data
Source	Year	Grid	Typical	Insularia	Carbonaria	GridX	GridY
cook2008	1984	SE	5	1	31	434.484	439.651
cook2008	1985	SE	5	0	35	434.484	439.651
cook2008	1986	SE	6	2	96	434.484	439.651
cook2008	1987	SE	2	0	29	434.484	439.651
cook2008	1988	SE	6	2	48	434.484	439.651
cook2008	1989	SE	1	4	10	434.484	439.651
cook2008	1990	SE	2	2	14	434.484	439.651
cook2008	1991	SE	5	1	10	434.484	439.651
cook2008	1992	SE	5	0	6	434.484	439.651
cook2008	1993	SE	6	0	10	434.484	439.651
cook2008	1994	SE	2	0	2	434.484	439.651
cook2008	1995	SE	6	0	3	434.484	439.651
cook2008	1996	SE	1	0	2	434.484	439.651
cook2008	1997	SE	2	0	2	434.484	439.651
cook2008	1998	SE	3	0	3	434.484	439.651
cook2008	1999	SE	14	2	5	434.484	439.651
cook2008	2000	SE	3	0	3	434.484	439.651
cook2008	2001	SE	6	0	1	434.484	439.651
cook2008	2002	SE	4	0	0	434.484	439.651
cook2008	2003	SE	0	0	0	434.484	439.651
cook2008	2004	SE	1	0	0	434.484	439.651
cook2008	2005	SE	2	0	1	434.484	439.651
cook2008	2006	SE	2	0	1	434.484	439.651
cook2008	1966	SE	1	0	26	462	450
cook2008	1970	SE	0	0	29	462	450
cook2008	1984	SE	1	0	27	434.484	439.387
cook2008	1985	SE	5	0	48	434.484	439.387
cook2008	1986	SE	3	0	83	434.484	439.387
cook2008	1987	SE	1	0	12	434.484	439.387
cook2008	1990	SE	2	0	5	434.484	439.387
cook2008	1991	SE	16	0	34	434.484	439.387
cook2008	1992	SE	9	0	27	434.484	439.387
cook2008	1993	SE	11	0	18	434.484	439.387
cook2008	1994	SE	11	0	7	434.484	439.387
cook2008	1995	SE	5	0	1	434.484	439.387
cook2008	1996	SE	1	0	4	434.484	439.387
cook2008	1997	SE	1	0	2	434.484	439.387
cook2008	1998	SE	8	0	1	434.484	439.387
cook2008	1999	SE	13	0	9	434.484	439.387
cook2008	2000	SE	18	0	6	434.484	439.387
cook2008	2003	SE	15	0	1	434.484	439.387
cook2005	1967	SE	0	0	47	437.7	436.6
cook2005	1968	SE	0	0	58	437.7	436.6
cook2005	1969	SE	0	0	27	437.7	436.6
cook2005	1970	SE	1	0	75	437.7	436.6
cook2005	1971	SE	0	0	41	437.7	436.6
cook2005	1972	SE	0	0	76	437.7	436.6
cook2005	1973	SE	1	0	40	437.7	436.6
cook2005	1974	SE	0	0	40	437.7	436.6
cook2005	1975	SE	0	0	3	437.7	436.6
cook2005	1976	SE	2	0	19	437.7	436.6
cook2005	1977	SE	0	0	18	437.7	436.6
cook2005	1978	SE	2	0	23	437.7	436.6
cook2005	1979	SE	3	0	43	437.7	436.6
cook2005	1980	SE	2	0	49	437.7	436.6
cook2005	1982	SE	4	0	48	437.7	436.6
cook2005	1983	SE	4	0	57	437.7	436.6
cook2005	1984	SE	1	0	27	437.7	436.6
cook2005	1985	SE	5	0	48	437.7	436.6
cook2005	1986	SE	3	0	83	437.7	436.6
cook2005	1987	SE	1	0	12	437.7	436.6
cook2005	1990	SE	2	0	5	437.7	436.6
cook2005	1991	SE	16	0	34	437.7	436.6
cook2005	1992	SE	9	0	27	437.7	436.6
cook2005	1993	SE	11	0	18	437.7	436.6
cook2005	1994	SE	11	0	7	437.7	436.6
cook2005	1995	SE	5	0	1	437.7	436.6
cook2005	1996	SE	1	0	4	437.7	436.6
cook2005	1997	SE	1	0	2	437.7	436.6
cook2005	1998	SE	8	0	1	437.7	436.6
cook2005	1999	SE	13	0	9	437.7	436.6
cook2005	2000	SE	18	0	6	437.7	436.6
cook2005	2003	SE	15	0	1	437.7	436.6
cook2005	1990	SE	6	2	11	461	458.7
cook2005	1991	SE	12	1	21	461	458.7
cook2005	1992	SE	7	0	20	461	458.7
cook2005	1993	SE	6	1	16	461	458.7
cook2005	1994	SE	6	0	9	461	458.7
cook2005	1995	SE	2	0	6	461	458.7
cook2005	1996	SE	15	3	19	461	458.7
cook2005	1997	SE	9	2	8	461	458.7
cook2005	1998	SE	8	2	7	461	458.7
cook2005	1999	SE	17	0	10	461	458.7
cook2005	2000	SE	16	3	5	461	458.7
cook2005	2001	SE	12	2	7	461	458.7
cook2005	2002	SE	30	0	14	461	458.7
cook2005	2003	SE	19	1	7	461	458.7
cook2005	2004	SE	12	1	2	461	458.7
grant1997	1959	SJ	19	0	264	322.166	386.608
grant1997	1996	NJ	38	0	0	358.459	858.172
grant1997	1996	SC	66	0	6	233.079	484.062
grant1997	1996	SE	18	0	19	460.247	451.193
grant1997	1996	SJ	184	0	17	322.166	386.808
grant1997	1996	TA	9	0	4	539.9	410.89
grant1997	1996	SJ	46	0	11	384.919	381.121
grant1997	1996	SJ	250	0	18	331.528	365.789
grant1997	1996	SK	301	0	72	456.09	339.935
grant1997	1996	TG	20	0	6	603.198	329.348
grant1997	1996	TL	45	0	8	595.966	297.628
grant1997	1996	SO	24	0	5	394.429	290.184
grant1997	1996	SU	95	0	6	454.752	193.864
grant1997	1996	TL	113	0	11	599.919	224.733
grant1997	1996	TL	40	0	10	622.419	221.971
grant1997	1996	TQ	68	0	16	537.915	192.873
grant1997	1996	ST	49	0	4	374.953	165.171
grant1997	1996	TQ	30	0	3	543.231	132.337
grant1997	1996	SY	30	0	0	353.37	86.867
lees1975	1953	SO	63	30	528	398.722	277.129
lees1975	1955	SO	53	20	486	398.722	277.129
lees1975	1973	SO	12	1	47	398.722	277.129
lees1975	1954	TM	20	11	106	622.53	292.689
lees1975	1954	TM	10	4	42	653.382	292.48
lees1975	1955	TM	4	1	13	642.448	289.952
lees1975	1973	TM	14	9	41	623.458	284.315
lees1975	1973	TM	6	5	23	646.924	286.927
lees1975	1972	ST	119	148	29	306.112	184.983
lees1975	1973	ST	11	20	3	318.104	176.472
lees1975	1968	TF	45	18	25	529.054	324.913
lees1975	1968	SP	325	189	199	447.568	208.693
lees1975	1957	TL	5	1	109	544.365	258.932
lees1975	1973	TL	10	2	22	544.365	258.932
lees1975	1953	TM	6	3	29	608.806	255.096
lees1975	1973	TM	20	14	29	636.043	255.096
lees1975	1954	TF	10	4	144	532.683	387.363
lees1975	1972	TF	16	7	76	532.683	387.363
lees1975	1969	SU	11	1	86	498.662	193.314
lees1975	1973	SU	16	14	49	498.662	193.314
kettlewell1958	1956	SP	1	0	20	494.674	233.544
kettlewell1958	1956	SP	27	4	144	491.99	225.157
kettlewell1958	1956	SU	50	6	7	446.987	167.642
kettlewell1958	1956	TL	4	3	82	544.365	258.932
kettlewell1958	1956	SJ	7	1	116	340.336	366.044
kettlewell1958	1956	SJ	38	14	517	356.271	368.577
kettlewell1958	1956	SJ	3	0	41	326.923	381.911
kettlewell1958	1956	SJ	3	0	189	326.06	387.706
kettlewell1958	1956	NY	34	7	15	351.239	530.177
kettlewell1958	1956	SK	1	0	169	437.781	371.911
kettlewell1958	1956	SX	100	0	0	289.785	61.841
kettlewell1958	1956	SX	500	0	0	273.243	94.079
kettlewell1958	1956	SY	324	19	3	377.51	97.779
kettlewell1958	1956	SY	163	5	0	372.899	86.583
kettlewell1958	1956	TM	55	54	706	600.398	206.809
kettlewell1958	1956	TQ	21	30	302	586.246	186.374
kettlewell1958	1956	SO	28	27	17	379.977	211.906
kettlewell1958	1956	ST	90	66	29	385.031	199.696
kettlewell1958	1956	SZ	24	4	12	408.503	91.204
kettlewell1958	1956	SU	266	24	34	442.28	120.75
kettlewell1958	1956	TQ	2025	442	628	588.496	162.838
kettlewell1958	1956	SU	33	3	2	414.775	114.195
kettlewell1958	1956	SU	28	0	5	447.975	129.521
kettlewell1958	1956	SU	149	21	145	480.84	153.717
kettlewell1958	1956	SO	25	14	15	377.5	245.917
kettlewell1958	1956	TL	11	14	206	548.907	221.579
kettlewell1958	1956	SU	36	17	272	450.097	175.917
kettlewell1958	1956	SP	36	21	159	492.283	211.376
kettlewell1958	1956	SC	35	25	9	231.204	472.235
kettlewell1958	1956	TQ	5	1	48	542.171	165.069
kettlewell1958	1956	TR	65	15	60	622.669	136.483
kettlewell1958	1956	TQ	48	12	164	576.228	155.767
kettlewell1958	1956	SD	5	0	89	329.787	407.208
kettlewell1958	1956	SD	12	0	108	333.579	417.294
kettlewell1958	1956	SJ	0	7	343	383.585	398.126
kettlewell1958	1956	SP	11	3	79	473.265	287.388
kettlewell1958	1956	TA	6	3	72	526.451	408.844
kettlewell1958	1956	TF	10	4	144	532.683	387.363
kettlewell1958	1956	SP	19	13	295	455.667	296.641
kettlewell1958	1956	TQ	51	33	474	512.287	189.252
kettlewell1958	1956	TG	9	5	29	622.108	341.93
kettlewell1958	1956	TM	20	11	106	622.53	292.689
kettlewell1958	1956	SP	41	17	230	488.994	267.945
kettlewell1958	1956	SP	294	179	244	451.21	206.649
kettlewell1958	1956	SP	142	48	99	445.092	225.218
kettlewell1958	1956	NS	3	0	26	259.734	665.009
kettlewell1958	1956	NN	285	0	0	266.22	758.789
kettlewell1958	1956	NN	100	0	0	271.613	799.176
kettlewell1958	1956	ST	19	11	8	346.641	175.285
kettlewell1958	1956	TM	10	4	42	653.382	292.48
kettlewell1958	1956	TQ	87	25	372	510.817	160.053
kettlewell1958	1956	TQ	14	3	11	506.232	139.133
kettlewell1958	1956	TQ	197	91	1147	502.413	163.961
kettlewell1958	1956	TQ	272	111	1238	500.541	159.094
kettlewell1958	1956	TQ	7	1	9	531.503	104.918
kettlewell1958	1956	TV	43	35	28	561.257	98.859
kettlewell1958	1956	TQ	14	0	11	539.53	137.965
kettlewell1958	1956	TQ	284	39	60	581.594	109.465
kettlewell1958	1956	SU	47	5	7	497.813	121.666
kettlewell1958	1956	SH	103	1	3	272.901	318.024
kettlewell1958	1956	SH	100	0	0	278.952	382.155
kettlewell1958	1956	SO	11	11	6	360.085	224.377
kettlewell1958	1956	SP	144	64	1403	406.315	286.749
kettlewell1958	1956	SK	3	1	36	400.03	316.486
kettlewell1958	1956	SP	4	2	12	433.782	243.927
kettlewell1958	1956	SO	21	3	43	381.183	276.365
kettlewell1958	1956	SD	19	5	23	351.442	492.305
kettlewell1958	1956	ST	45	4	5	387.303	145.144
kettlewell1958	1956	ST	367	52	41	387.303	145.144
kettlewell1958	1956	SE	4	2	94	400.463	488.305
kettlewell1958	1956	SE	10	12	486	416.019	433.296
kettlewell1958	1956	SE	0	0	60	400.217	463.942
kettlewell1958	1956	SK	2	2	405	435.714	387.496
clark1994	1959	SJ	17	2	264	322.635	385.261
clark1994	1960	SJ	11	2	212	322.635	385.261
clark1994	1961	SJ	28	2	401	322.635	385.261
clark1994	1962	SJ	50	8	781	322.635	385.261
clark1994	1963	SJ	72	12	910	322.635	385.261
clark1994	1964	SJ	87	11	884	322.635	385.261
clark1994	1965	SJ	40	7	431	322.635	385.261
clark1994	1966	SJ	20	6	273	322.635	385.261
clark1994	1967	SJ	30	1	366	322.635	385.261
clark1994	1968	SJ	48	4	425	322.635	385.261
clark1994	1969	SJ	42	3	565	322.635	385.261
clark1994	1970	SJ	70	8	770	322.635	385.261
clark1994	1971	SJ	18	1	188	322.635	385.261
clark1994	1972	SJ	29	0	247	322.635	385.261
clark1994	1973	SJ	31	4	283	322.635	385.261
clark1994	1974	SJ	33	3	277	322.635	385.261
clark1994	1975	SJ	32	4	233	322.635	385.261
clark1994	1976	SJ	53	22	371	322.635	385.261
clark1994	1977	SJ	53	9	428	322.635	385.261
clark1994	1978	SJ	46	13	296	322.635	385.261
clark1994	1979	SJ	126	8	497	322.635	385.261
clark1994	1980	SJ	130	25	482	322.635	385.261
clark1994	1981	SJ	103	8	296	322.635	385.261
clark1994	1982	SJ	28	6	88	322.635	385.261
clark1994	1983	SJ	225	19	445	322.635	385.261
clark1994	1984	SJ	120	17	215	322.635	385.261
clark1994	1985	SJ	376	24	460	322.635	385.261
clark1994	1986	SJ	401	22	382	322.635	385.261
clark1994	1987	SJ	247	15	182	322.635	385.261
clark1994	1988	SJ	102	4	73	322.635	385.261
clark1994	1989	SJ	149	5	65	322.635	385.261
clark1994	1990	SJ	97	6	51	322.635	385.261
clark1994	1991	SJ	655	37	241	322.635	385.261
clark1994	1992	SJ	779	31	247	322.635	385.261
clark1994	1993	SJ	199	12	63	322.635	385.261
cook1999	1978	SJ	12	2	45	322.929	390.005
cook1999	1978	SJ	12	3	106	335.895	380.571
cook1999	1978	SJ	6	0	37	327.336	384.604
cook1999	1998	SJ	5	1	1	376.663	394.502
cook1999	1992	SJ	9	3	6	346.516	382.563
cook1999	1996	SJ	8	0	1	346.516	382.563
cook1999	1993	SJ	3	0	2	370	380
cook1999	1996	SJ	42	4	11	384.919	381.121
cook1999	1997	SJ	43	4	5	384.919	381.121
cook1999	1998	SJ	24	0	1	384.919	381.121
cook1999	1984	SJ	14	0	38	391.944	383.537
cook1999	1988	SJ	8	0	34	391.944	383.537
cook1999	1991	SJ	8	0	12	391.944	383.537
cook1999	1994	SJ	22	0	7	391.944	383.537
cook1999	1996	SJ	35	2	11	391.944	383.537
cook1999	1988	SK	4	0	14	400	380
cook1999	1993	SK	6	0	3	400	380
cook1999	1996	SK	9	1	1	400	360
west1993	1994	TQ	34	27	19	555.414	174.076
west1993	1995	TQ	51	27	24	555.414	174.076
west1993	1996	TQ	70	34	30	555.414	174.076
west1993	1997	TQ	87	36	15	555.414	174.076
west1993	1998	TQ	89	55	19	555.414	174.076
west1993	1999	TQ	36	24	7	555.414	174.076
west1993	2000	TQ	28	22	5	555.414	174.076
west1993	2001	TQ	38	21	7	555.414	174.076
west1993	2002	TQ	44	26	6	555.414	174.076
west1993	1972	TQ	17	9	93	555.414	174.076
west1993	1976	TQ	11	14	82	555.414	174.076
west1993	1980	TQ	17	11	71	555.414	174.076
west1993	1984	TQ	19	17	66	555.414	174.076
west1993	1988	TQ	41	34	89	555.414	174.076
west1993	1992	TQ	43	37	39	555.414	174.076
west1993	1996	TQ	59	32	23	555.414	174.076
west1993	2000	TQ	48	31	9	555.414	174.076

## Sheet: Cook & Turner 2008
JRGT site - NGR 434484 439651
Year	Carbonaria	Insularia	Typical
1984	31	1	5
1985	35	0	5
1986	96	2	6
1987	29	0	2
1988	48	2	6
1989	10	4	1
1990	14	2	2
1991	10	1	5
1992	6	0	5
1993	10	0	6
1994	2	0	2
1995	3	0	6
1996	2	0	1
1997	2	0	2
1998	3	0	3
1999	5	2	14
2000	3	0	3
2001	1	0	6
2002	0	0	4
2003	0	0	0
2004	0	0	1
2005	1	0	2
2006	1	0	2
JRGT York - NGR 462450
Year	Carbonaria	Insularia	Typical
1966	26	0	1
1970	29	0	0
SLS (Cook et al. 2005) - NGR 434484 439387
	Carbonaria	Insulara+Typical
1984	27	1
1985	48	5
1986	83	3
1987	12	1
1988
1989
1990	5	2
1991	34	16
1992	27	9
1993	18	11
1994	7	11
1995	1	5
1996	4	1
1997	2	1
1998	1	8
1999	9	13
2000	6	18
2001
2002
2003	1	15
2004
2005
2006

## Sheet: Cook et al. 2005
Leeds - NGR 4377 4366 and NGR 43344 4394
Date	Melanic	Non-melanic
1967	47	0
1968	58	0
1969	27	0
1970	75	1
1971	41	0
1972	76	0
1973	40	1
1974	40	0
1975	3	0
1976	19	2
1977	18	0
1978	23	2
1979	43	3
1980	49	2
1981
1982	48	4
1983	57	4
1984	27	1
1985	48	5
1986	83	3
1987	12	1
1988
1989
1990	5	2
1991	34	16
1992	27	9
1993	18	11
1994	7	11
1995	1	5
1996	4	1
1997	2	1
1998	1	8
1999	9	13
2000	6	18
2001
2002
2003	1	15
York - NGR 4610 4587
Date	Carbonaria	Insularia	Typical
1990	11	2	6
1991	21	1	12
1992	20	0	7
1993	16	1	6
1994	9	0	6
1995	6	0	2
1996	19	3	15
1997	8	2	9
1998	7	2	8
1999	10	0	17
2000	5	3	16
2001	7	2	12
2002	14	0	30
2003	7	1	19
2004	2	1	12

## Sheet: Grant et al. 1997
1956				Grid	GridX	GridY
Location	Melanic	N
Newtonmore	0	100		NN	271.613	799.176
Isle of Man	13.11	69		SC	233.079	484.062
Bradford	95.67	508		SE	416.019	433.296
Grimsby	88.89	81		TA	526.451	408.844
Manchester	98	350		SD	383.585	398.126
Chester	93.55	124		SJ	340.336	366.044
Chesterfield	99.41	170		SK	437.781	371.911
Cromer	67.44	43		TG	622.108	341.93
Fritton	77.37	137		TM	622.53	292.689
Birmingham	87.09	1611		SP	406.315	286.749
Oxford	34.03	717		SP	451.21	206.649
Bradwell-on-Sea	86.25	818		TM	600.398	206.809
Bishop's Stortford	89.18	231		TL	548.907	221.579
Marlborough	8.91	460		SU	418.878	169.181
Billingshurst	11.63	129		TQ	508.64	125.784
Broadmayne	0	168		SY	372.899	86.583
1959
West Kirby	93.3	283		SJ	322.166	386.608
1996
Cornhill	0	38		NJ	358.459	858.172
Isle of Man	8.33	72		SC	233.079	484.062
York	51.35	37		SE	460.247	451.193
West Kirby	8.46	201		SJ	322.166	386.808
Spurn	30.77	13		TA	539.9	410.89
Wilmslow	19.3	57		SJ	384.919	381.121
Hawarden	6.72	268		SJ	331.528	365.789
Nottingham	19.34	373		SK	456.09	339.935
Hindolveston	23.08	26		TG	603.198	329.348
Caston	15.09	53		TL	595.966	297.628
Dudley	17.24	29		SO	394.429	290.184
Long Wittenham	5.94	101		SU	454.752	193.864
Colchester	8.87	124		TL	599.919	224.733
Kirby-le-Soken	20	50		TM	622.419	221.971
North Chingford	19.04	84		TQ	537.915	192.873
Bath	7.54	53		ST	374.953	165.171
Ashdown Forest	9.09	33		TQ	543.231	132.337
West Bexington	0	30		SY	353.37	86.867

## Sheet: Lees & Creed 1975
From the predation experiment						Grid	GridX	GridY
Site	Year	Typical	Insularia	Carbonaria
Rubery	1953	63	30	528		SO	398.722	277.129
Rubery	1955	53	20	486		SO	398.722	277.129
Rubery	1973	12	1	47		SO	398.722	277.129
Fritton	1952-56	20	11	106		TM	622.53	292.689
Lowestoft	1952-56	10	4	42		TM	653.382	292.48
Beccles	1955-56	4	1	13		TM	642.448	289.952
Starston	1973	14	9	41		TM	623.458	284.315
Hulver Street	1973	6	5	23		TM	646.924	286.927
Given in table 9 - mostly personal communications
Site	Year	Typical	Insularia	Carbonaria
Beddau	1972-73	119	148	29		ST	306.112	184.983
Cardiff	1973	11	20	3		ST	318.104	176.472
Weston	1968	45	18	25		TF	529.054	324.913
Wytham	1968-69	325	189	199		SP	447.568	208.693
Cambridge	1957-64	5	1	109		TL	544.365	258.932
Cambridge	1973	10	2	22		TL	544.365	258.932
Needham Market	1953	6	3	29		TM	608.806	255.096
Tunstall	1973	20	14	29		TM	636.043	255.096
Louth	1952-56	10	4	144		TF	532.683	387.363
Louth	1972	16	7	76		TF	532.683	387.363
Chalfont St. Giles	1969	11	1	86		SU	498.662	193.314
Chalfont St. Giles	1973	16	14	49		SU	498.662	193.314

## Sheet: Kettlewell 1958
County	Town	Typical	Carbonaria	Insularia	Total	Grid	GridX	GridY
Bedfordshire	Woburn	4.76	95.23	0	21	SP	494.674	233.544
Bedfordshire	Leighton Buzzard	15.43	82.28	2.29	175	SP	491.99	225.157
Berkshire	Newbury	79.37	11.11	9.52	63	SU	446.987	167.642
Cambridgeshire	Cambridge	4.54	92.95	3.41	88	TL	544.365	258.932
Cheshire	Chester	5.65	93.55	0.81	124	SJ	340.336	366.044
Cheshire	Delamere	6.68	90.86	2.46	569	SJ	356.271	368.577
Cheshire	Heswall	6.82	93.18	0	44	SJ	326.923	381.911
Cheshire	Wirrall	1.56	98.44	0	192	SJ	326.06	387.706
Cumberland	Penrith	60.71	26.79	12.5	56	NY	351.239	530.177
Derbyshire	Chesterfield	0.59	99.41	0	170	SK	437.781	371.911
Devon & Cornwall	Torbay	100	0	0	100	SX	289.785	61.841
Devon & Cornwall	Various	100	0	0	500	SX	273.243	94.079
Dorset	Dean End Wood	93.64	0.87	5.49	346	SY	377.51	97.779
Dorset	Broadmayne	97.02	0	2.98	168	SY	372.899	86.583
Essex	Bradwell-on-sea	6.69	86.25	6.57	818	TM	600.398	206.809
Essex	Westcliffe-on-sea	5.95	85.55	8.5	353	TQ	586.246	186.374
Gloucestershire	Hardwicke	38.89	23.61	37.5	72	SO	379.977	211.906
Gloucestershire	Nailsworth	48.65	15.68	35.67	185	ST	385.031	199.696
Hampshire	Bournemouth	60	30	10	40	SZ	408.503	91.204
Hampshire	Chandler's Ford	82.1	10.49	7.41	324	SU	442.28	120.75
Hampshire	Borden	65.43	20.29	14.28	3095	TQ	588.496	162.838
Hampshire	Fordingbridge	86.84	5.26	7.89	38	SU	414.775	114.195
Hampshire	Winchester	84.85	15.15	0	33	SU	447.975	129.521
Hampshire	Fleet	47.31	46.03	6.66	315	SU	480.84	153.717
Herefordshire	Malvern	46.3	27.8	25.9	54	SO	377.5	245.917
Hertfordshire	Bishops Stortford	4.76	89.18	6.06	231	TL	548.907	221.579
Hertfordshire	Rothampsted	11.08	83.69	5.23	325	SU	450.097	175.917
Hertfordshire	Tring	16.89	74.3	9.81	214	SP	492.283	211.376
Isle of Man	Santon	50.7	13.11	36.2	69	SC	231.204	472.235
Kent	Bromley	9.26	88.89	1.85	54	TQ	542.171	165.069
Kent	Folkestone	46.43	42.86	10.71	140	TR	622.669	136.483
Kent	Maidstone	21.43	73.21	5.36	224	TQ	576.228	155.767
Lancashire	Formby	5.32	94.67	0	94	SD	329.787	407.208
Lancashire	Southport	10	90	0	120	SD	333.579	417.294
Lancashire	Manchester	0	98	2	350	SJ	383.585	398.126
Leicestershire	Market Harborough	11.8	84.95	3.32	93	SP	473.265	287.388
Lincolnshire	Grimsby	7.41	88.89	3.75	81	TA	526.451	408.844
Lincolnshire	Louth	6.33	91.13	2.53	158	TF	532.683	387.363
London	Whetstone	5.81	90.21	3.98	327	SP	455.667	296.641
Middlesex	Pinner	9.14	84.95	5.91	558	TQ	512.287	189.252
Norfolk	Cromer	20.93	67.44	11.63	43	TG	622.108	341.93
Norfolk	Fritton	14.6	77.37	8.03	137	TM	622.53	292.689
Northamptonshire	Wellingborough	14.24	79.88	5.9	288	SP	488.994	267.945
Oxfordshire	Oxford	41	34.03	24.97	717	SP	451.21	206.649
Oxfordshire	Steeple Barton	49.13	34.26	16.61	289	SP	445.092	225.218
Scotland	Glasgow	10.33	89.66	0	29	NS	259.734	665.009
Scotland	Kinloch Rannoch	100	0	0	285	NN	266.22	758.789
Scotland	Newtonmore	100	0	0	100	NN	271.613	799.176
Somerset	Portishead	50	20	30	37.5	ST	346.641	175.285
Suffolk	Lowestoft	17.86	75	7.14	56	TM	653.382	292.48
Surrey	Cobham	17.98	76.86	5.17	484	TQ	510.817	160.053
Surrey	Cranleigh	50	39.3	10.7	28	TQ	506.232	139.133
Surrey	Ottershaw	13.73	79.93	6.34	1435	TQ	502.413	163.961
Surrey	Woking	16.84	76.66	6.88	1615	TQ	500.541	159.094
Sussex	Brighton	41.18	52.94	5.88	17	TQ	531.503	104.918
Sussex	Eastbourne	40.57	26.42	33.02	106	TV	561.257	98.859
Sussex	East Grinstead	66.7	53.3	0	21	TQ	539.53	137.965
Sussex	Hastings	74.15	15.67	10.18	383	TQ	581.594	109.465
Sussex	Petworth	79.66	11.86	8.47	59	SU	497.813	121.666
North Wales	Dolgelley	95.17	2.78	1.35	108	SH	272.901	318.024
North Wales	Llandudno	100	0	0	100	SH	278.952	382.155
Hereford	Ross on Wye	39.29	21.43	39.29	28	SO	360.085	224.377
Warwickshire	Birmingham	8.94	87.09	3.98	1611	SP	406.315	286.749
Warwickshire	Cannock Chase	7.5	90	2.5	40	SK	400.03	316.486
Warwickshire	Tysoe	22.22	66.67	11.11	18	SP	433.782	243.927
Warwickshire	Wyre Forest	31.34	64.18	4.48	67	SO	381.183	276.365
Westmorland	Kendal	40.43	48.94	10.64	47	SD	351.442	492.305
Witshire	Warminster	83.33	9.26	7.41	54	ST	387.303	145.144
Wiltshire	Warminster	79.78	8.91	11.3	460	ST	387.303	145.144
Yorkshire	Aysgarth	4	94	2	100	SE	400.463	488.305
Yorkshire	Bradford	1.97	95.67	2.36	508	SE	416.019	433.296
Yorkshire	Grassington	0	100	0	60	SE	400.217	463.942
Yorkshire	Sheffield	0.5	99	0.5	409	SK	435.714	387.496

## Sheet: Clarke et al. 1994
Caldy Common - West Kirby, Wirral.
Year	Carbonaria	Insularia	Typical	Grid
1959	264	2	17	SJ
1960	212	2	11	SJ
1961	401	2	28	SJ
1962	781	8	50	SJ
1963	910	12	72	SJ
1964	884	11	87	SJ
1965	431	7	40	SJ
1966	273	6	20	SJ
1967	366	1	30	SJ
1968	425	4	48	SJ
1969	565	3	42	SJ
1970	770	8	70	SJ
1971	188	1	18	SJ
1972	247	0	29	SJ
1973	283	4	31	SJ
1974	277	3	33	SJ
1975	233	4	32	SJ
1976	371	22	53	SJ
1977	428	9	53	SJ
1978	296	13	46	SJ
1979	497	8	126	SJ
1980	482	25	130	SJ
1981	296	8	103	SJ
1982	88	6	28	SJ
1983	445	19	225	SJ
1984	215	17	120	SJ
1985	460	24	376	SJ
1986	382	22	401	SJ
1987	182	15	247	SJ
1988	73	4	102	SJ
1989	65	5	149	SJ
1990	51	6	97	SJ
1991	241	37	655	SJ
1992	247	31	779	SJ
1993	63	12	199	SJ

## Sheet: Cook et al. 1999
North west England
Location	GR	date	Typical	Insularia	Carbonaria	GridX	GridY
Meols	SJ28	1978	12	2	45	322.929	390.005
Eastham	SJ38	1978	12	3	106	335.895	380.571
Thingwall	SJ28	1978	6	0	37	327.336	384.604
Urnston	SJ79	1998	5	1	1	376.663	394.502
Hale	SJ78	1990-94	9	3	6	346.516	382.563
Hale	SJ78	1995-98	8	0	1	346.516	382.563
Whalley Ra.	SJ89	1993	3	0	2	370	380
Wilmslow	SJ88	1996	42	4	11	384.919	381.121
Wilmslow	SJ88	1997	43	4	5	384.919	381.121
Wilmslow	SJ88	1998	24	0	1	384.919	381.121
Poynton	SJ98	1983-86	14	0	38	391.944	383.537
Poynton	SJ98	1987-89	8	0	34	391.944	383.537
Poynton	SJ98	1990-92	8	0	12	391.944	383.537
Poynton	SJ98	1993-95	22	0	7	391.944	383.537
Poynton	SJ98	1996-97	35	2	11	391.944	383.537
New Mills	SK08	1987-89	4	0	14	400	380
New Mills	SK08	1991-96	6	0	3	400	380
N. Staffs	SK06	1996-97	9	1	1	400	360

## Sheet: west1993
Dartford, Kent
Assuming that the two tables in the paper report separate datasets, the second table is in 4 year chunks and the midpoints, rounding down, have been taken as the year.
Year	typica	insularia	carbonaria	N
1994	42.5	33.75	23.75	80		west1993	1994	TQ	34	27	19
1995	50	26.5	23.5	102		west1993	1995	TQ	51	27	24
1996	52	25.5	22.5	134		west1993	1996	TQ	70	34	30
1997	63	26	11	138		west1993	1997	TQ	87	36	15
1998	54.6	33.7	11.7	163		west1993	1998	TQ	89	55	19
1999	53.7	35.8	10.5	67		west1993	1999	TQ	36	24	7
2000	51	40	9	55		west1993	2000	TQ	28	22	5
2001	57.5	32	10.5	66		west1993	2001	TQ	38	21	7
2002	58	34	8	76		west1993	2002	TQ	44	26	6
1972	14.5	7.5	78	119		west1993	1972	TQ	17	9	93
1976	10.5	13	76.5	107		west1993	1976	TQ	11	14	82
1980	17	11	72	99		west1993	1980	TQ	17	11	71
1984	19	16.5	64.5	102		west1993	1984	TQ	19	17	66
1988	25	21	54	164		west1993	1988	TQ	41	34	89
1992	36.5	31	32.5	119		west1993	1992	TQ	43	37	39
1996	51.9	27.9	20.2	113		west1993	1996	TQ	59	32	23
2000	54.2	35.3	10.5	88		west1993	2000	TQ	48	31	9
